# Supplementary material
Source: PubMed Central journal article supplement (PMC7091454)
Supplement: jamapediatr-174-581-s001.pdf [file jamapediatr-174-581-s001.pdf]

## Supplementary Online Content

Barnes JM, Barker AR, King AA, Johnson KJ. Association of Medicaid expansion with insurance coverage among children with cancer. *JAMA Pediatr*. Published online March 23, 2020. doi:10.1001/jamapediatrics.2020.0052

**eMethods.** Sensitivity Analysis Methods, Missing Data, and Multiple Imputation

**eFigure 1.** Adjusted Difference-in-Differences (DID) Estimates of Percentage Point Change in Insurance Type

**eFigure 2.** Trends in Medicaid Coverage in Children With Cancer Over Study Period

**eFigure 3.** Change in Childhood Cancer Insurance Status Over Time by State Medicaid Expansion Status

**eFigure 4.** The Percentage of Adults Unemployed in EXP and NEXP States During Time Period Surrounding the Recession

**eTable 1.** Federal Poverty Limit Eligibility Levels for Medicaid/CHIP by Month/Year, Expansion Status, and Period

**eTable 2.** Results of Sensitivity Analyses

**eTable 3.** Characteristics of Study Population by Missing Data on Insurance Status

**eReferences.**

This supplementary material has been provided by the authors to give readers additional information about their work.

## eMethods. Sensitivity Analysis Methods, Missing Data, and Multiple Imputation

### Sensitivity Analyses Methods

We performed several sensitivity analyses. To evaluate how the multiple imputation procedure impacted results, we performed a complete case analysis. We also removed states expanding Medicaid in 2014 (Michigan, Hawaii, Iowa, New Mexico, Kentucky, Alaska), which were grouped with NEXP states in the main analysis. We removed cases diagnosed in 2014 or later to avoid potential confounding from other ACA policies enacted in 2014 (additional state Medicaid expansions, introduction of marketplace plans, etc.). We evaluated the 2014 expansions using 2011 to 2015 data, redefining EXP and NEXP states based on their 2014 expansion status (i.e. Iowa, Kentucky, and New Mexico were added to the early expanding states to include all states that had expanded by 2014) and using 2011 and 2013 to test the parallel trends assumption.

### Missing Data and Multiple Imputation

There were 1,316 observations (6.2%) with missing values. Most of the observations with missing values were due to missing insurance (n=722, 55% of missing observations, 3.4% of total). There were significant associations between insurance missingness and Medicaid expansion status, age, county education and poverty, and cancer type and stage (**eTable 3**). This suggests that the mechanism of missingness is not “missing completely at random,” indicating that analyses not based on multiple imputation may lead to biased estimates.<sup>2</sup> However, multiple imputation will lead to unbiased estimates if a fundamental assumption is met—that the data are “missing at random.” “Missing at random” indicates that any non-random mechanisms of missingness are explainable by the data that were observed (e.g. data that is missing due to lack of data at the time of coding can be explained by the observed year of diagnosis). Unbiased estimates can be generated through imputation under the missing at random scenario by adjusting for the variable(s) that explains the missing data pattern (year of diagnosis in the above scenario).<sup>2</sup> However, if the nonrandom mechanisms of missingness cannot be explained by observed data, then the data is considered “missing not at random” (MNAR) and more specialized approaches are required. However, there is no way to assess whether data are missing not at random. In the setting of missingness that can be explained by the observed data (such as expansion status and time period), multiple imputation is a superior option compared to complete case analysis, though we cannot exclude the possibility of MNAR and the subsequent risk of bias.

The `aregImpute()` function of the R `Hmisc` package was utilized to generate the multiple imputations. The imputation model included the variables period, state early Medicaid expansion status, an interaction between period and expansion status, all covariates, interactions between the covariates, period, and expansion status; insurance, cancer site, and stage at diagnosis. The interaction terms in the model were specified to avoid nullifying the associations with the response variables.<sup>2,3</sup> Seven complete datasets were imputed so that the number of imputations was approximately equal to the percentage of cases with missing values.<sup>3</sup> For reproducibility, the function `set.seed()` was specified, with seed equal to 1. Results across the imputed datasets were combined according to Rubin’ rules using the `mi.meld()` function of the R `Amelia` package.<sup>4</sup>

**eFigure 1.** Adjusted Difference-in-Differences (DID) Estimates of Percentage Point Change in Insurance Type

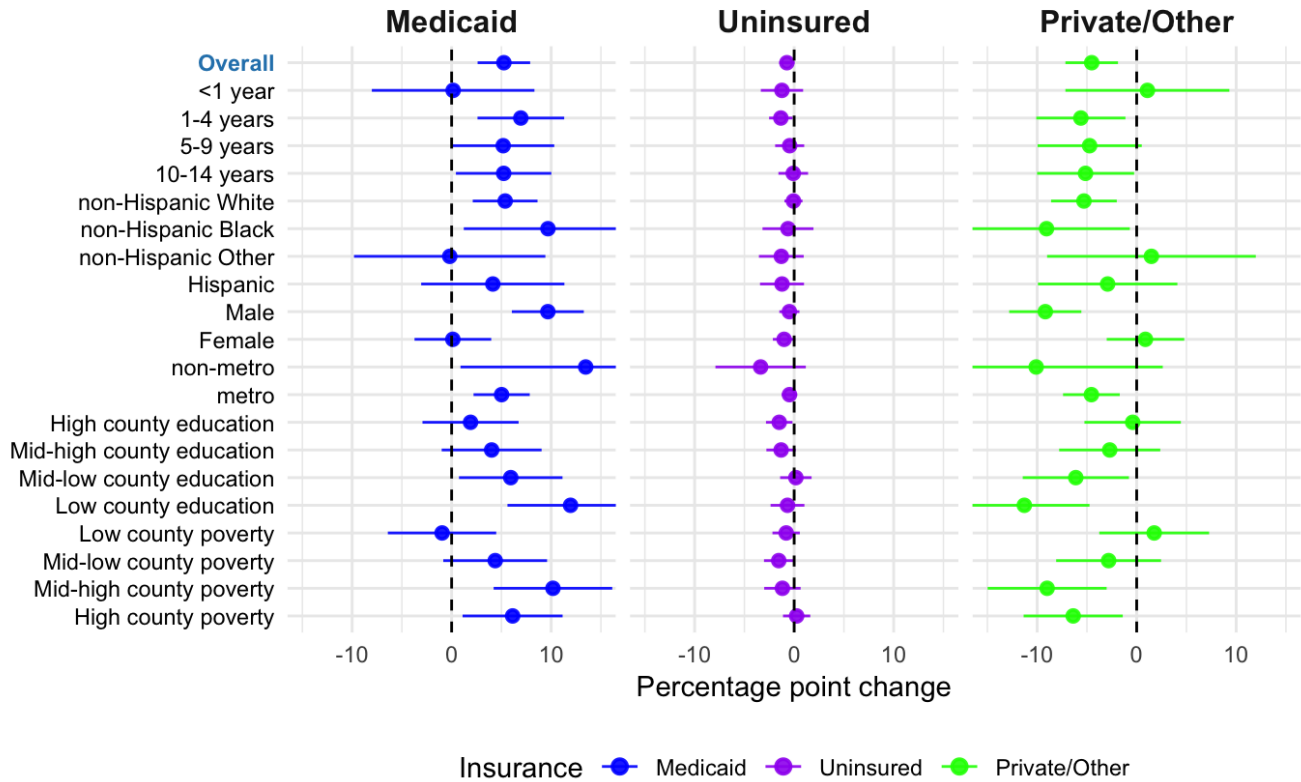

Changes are calculated after Medicaid expansion in early expansion relative to non-early expansion states.

eFigure 2. Trends in Medicaid Coverage in Children With Cancer Over Study Period

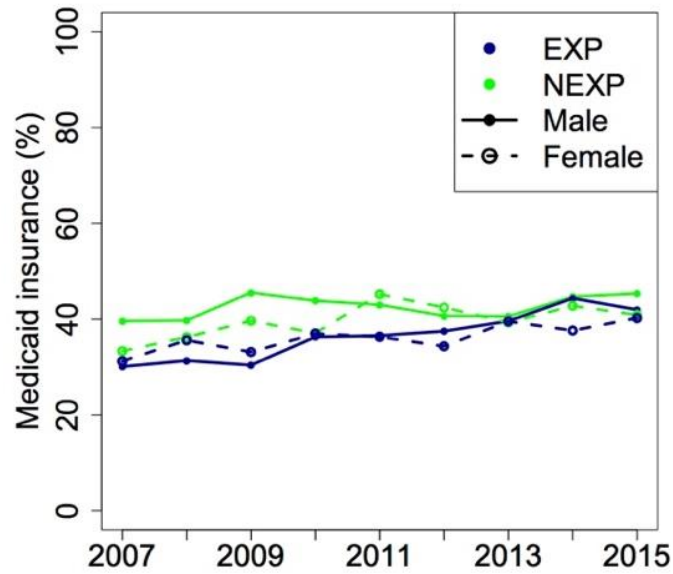

(A)

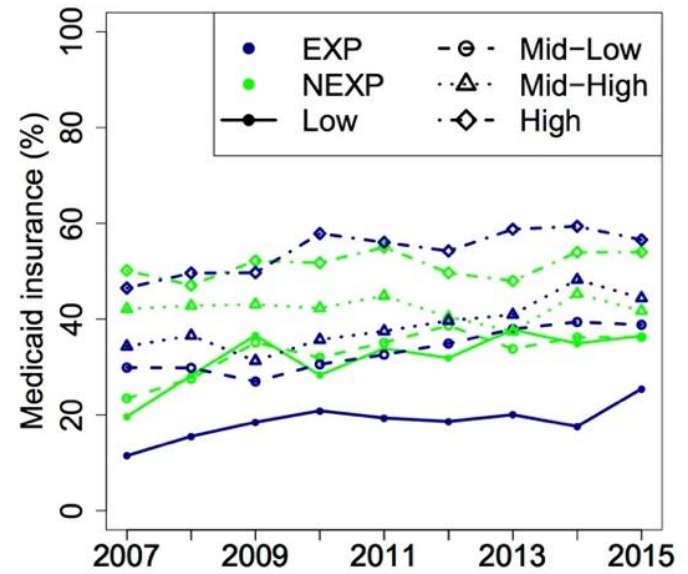

(B)

Stratified by sex (panel A) and county poverty levels (panel B).

**eFigure 3. Change in Childhood Cancer Insurance Status Over Time by State Medicaid Expansion Status**

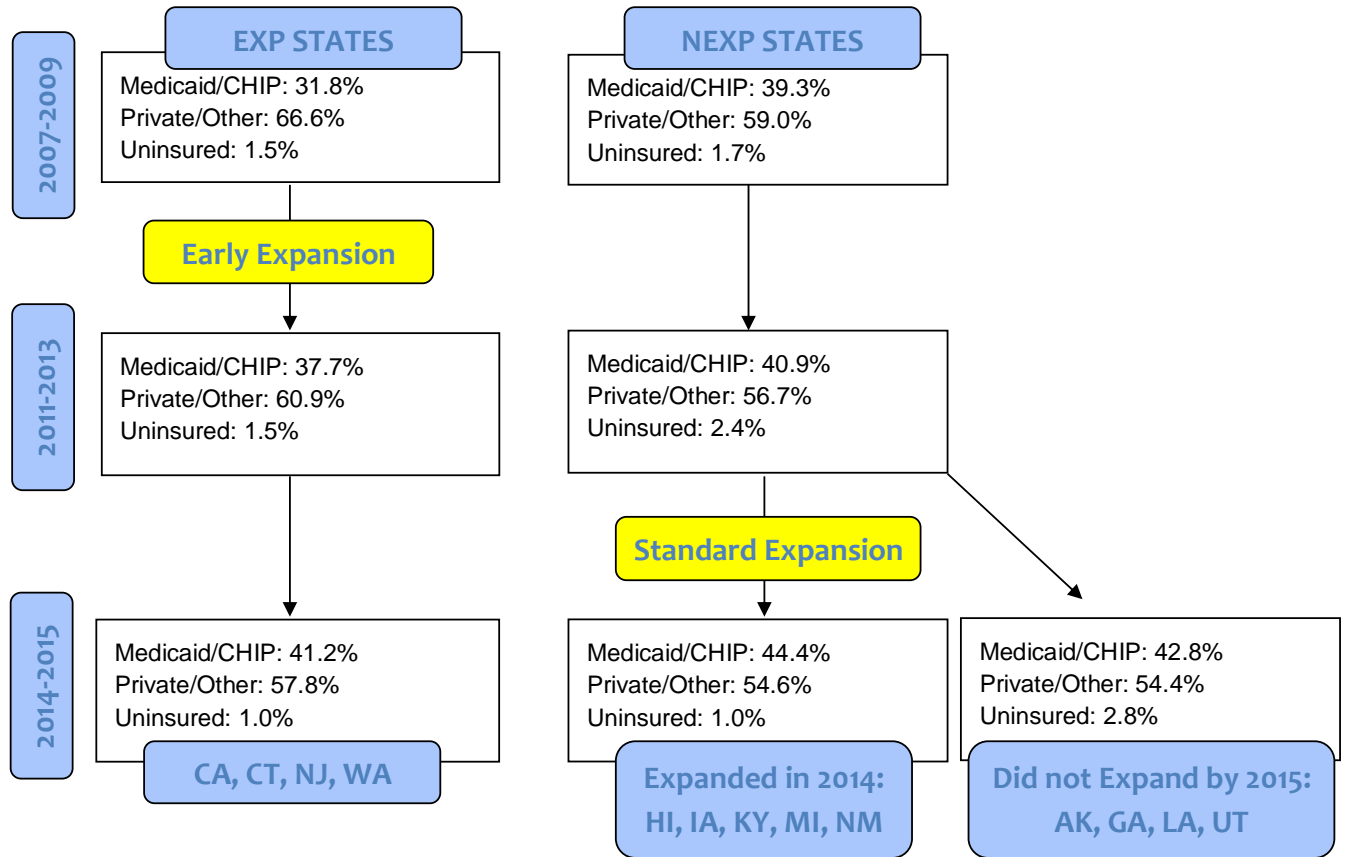

**eFigure 4. The Percentage of Adults Unemployed in EXP and NEXP States During Time Period Surrounding the Recession**

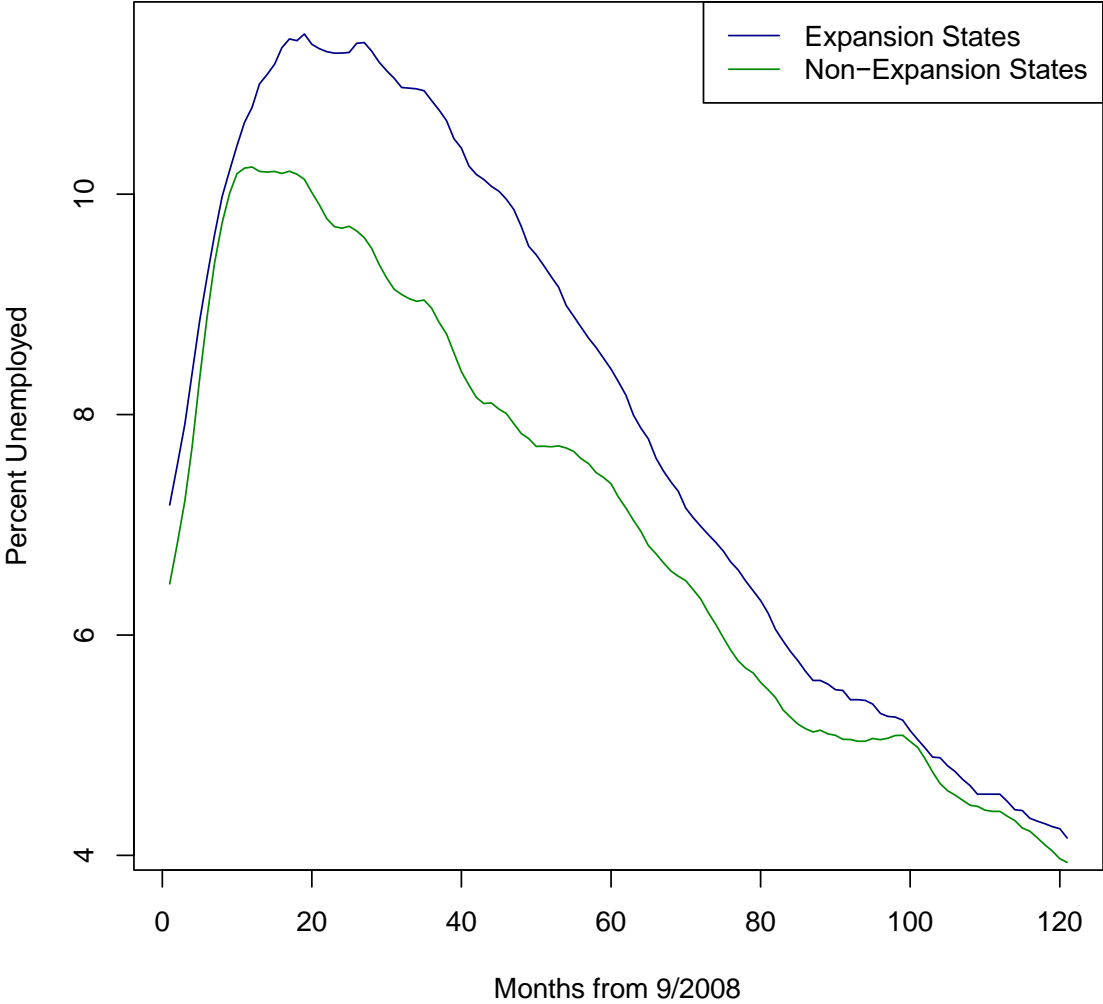

**eTable 1. Federal Poverty Limit Eligibility Levels for Medicaid/CHIP by Month/Year, Expansion Status, and Period**

|                                   | Jul-06       | Jan-08       | Jan-09       | Dec-09       | Jan-11       | Jan-12       | Jan-13       | Jan-14       | Jan-15       |
|-----------------------------------|--------------|--------------|--------------|--------------|--------------|--------------|--------------|--------------|--------------|
| <b>Early Expansion States</b>     |              |              |              |              |              |              |              |              |              |
| California                        | 250          | 250          | 250          | 250          | 250          | 250          | 250          | 266          | 266          |
| Connecticut                       | 300          | 300          | 300          | 300          | 300          | 300          | 300          | 323          | 323          |
| New Jersey                        | 350          | 350          | 350          | 350          | 350          | 350          | 350          | 355          | 355          |
| Washington                        | 250          | 250          | 250          | 300          | 300          | 300          | 300          | 305          | 317          |
| <b>Weighted Average</b>           | <b>268.9</b> | <b>268.9</b> | <b>268.9</b> | <b>273.1</b> | <b>273.1</b> | <b>273.1</b> | <b>273.1</b> | <b>286.8</b> | <b>287.8</b> |
| <b>Median</b>                     | <b>275</b>   | <b>275</b>   | <b>275</b>   | <b>300</b>   | <b>300</b>   | <b>300</b>   | <b>300</b>   | <b>314</b>   | <b>320</b>   |
| <b>Not Early Expansion States</b> |              |              |              |              |              |              |              |              |              |
| <i>Standard (2014) Expanders</i>  |              |              |              |              |              |              |              |              |              |
| Hawaii                            | 300          | 300          | 300          | 300          | 300          | 300          | 300          | 313          | 313          |
| Iowa                              | 200          | 200          | 200          | 300          | 300          | 300          | 300          | 380          | 380          |
| Kentucky                          | 200          | 200          | 200          | 200          | 200          | 200          | 200          | 218          | 218          |
| Michigan                          | 200          | 200          | 200          | 200          | 200          | 200          | 200          | 217          | 217          |
| New Mexico                        | 235          | 235          | 235          | 235          | 235          | 235          | 235          | 305          | 305          |
| <b>Weighted Average</b>           | <b>212.6</b> | <b>212.6</b> | <b>212.6</b> | <b>235.2</b> | <b>235.2</b> | <b>235.2</b> | <b>235.2</b> | <b>273.1</b> | <b>273.1</b> |
| <b>Median</b>                     | <b>200</b>   | <b>200</b>   | <b>200</b>   | <b>235</b>   | <b>235</b>   | <b>235</b>   | <b>235</b>   | <b>305</b>   | <b>305</b>   |
| <i>Never (by 2015) Expanders</i>  |              |              |              |              |              |              |              |              |              |
| Alaska                            | 175          | 175          | 175          | 175          | 175          | 175          | 175          | 208          | 208          |
| Georgia                           | 235          | 235          | 235          | 235          | 235          | 235          | 235          | 252          | 252          |
| Louisiana                         | 200          | 200          | 250          | 250          | 250          | 250          | 250          | 255          | 255          |
| Utah                              | 200          | 200          | 200          | 200          | 200          | 200          | 200          | 205          | 205          |
| <b>Weighted Average</b>           | <b>218.8</b> | <b>218.8</b> | <b>231.0</b> | <b>231.0</b> | <b>231.0</b> | <b>231.0</b> | <b>231.0</b> | <b>242.9</b> | <b>242.9</b> |
| <b>Median</b>                     | <b>200</b>   | <b>200</b>   | <b>217.5</b> | <b>217.5</b> | <b>217.5</b> | <b>217.5</b> | <b>217.5</b> | <b>230</b>   | <b>230</b>   |
| <i>Combined NEXP States</i>       |              |              |              |              |              |              |              |              |              |
| <b>Weighted Average</b>           | <b>216.1</b> | <b>216.1</b> | <b>222.9</b> | <b>232.8</b> | <b>232.8</b> | <b>232.8</b> | <b>232.8</b> | <b>256.2</b> | <b>256.2</b> |
| <b>Median</b>                     | <b>200</b>   | <b>200</b>   | <b>200</b>   | <b>235</b>   | <b>235</b>   | <b>235</b>   | <b>235</b>   | <b>252</b>   | <b>252</b>   |

**eTable 2. Results of Sensitivity Analyses<sup>a</sup>**

|                           | Analysis of 2014 Medicaid Expansion (2011-2015) |         |         | Complete case analysis         |         |         | Remove 2014-15 Medicaid expansion states |         |         | Remove 2014-2015               |         |         |
|---------------------------|-------------------------------------------------|---------|---------|--------------------------------|---------|---------|------------------------------------------|---------|---------|--------------------------------|---------|---------|
|                           | DID                                             |         | DDD     | DID                            |         | DDD     | DID                                      |         | DDD     | DID                            |         | DDD     |
|                           | Estimate (95% CI) <sup>b</sup>                  | p-value | p-value | Estimate (95% CI) <sup>b</sup> | p-value | p-value | Estimate (95% CI) <sup>b</sup>           | p-value | p-value | Estimate (95% CI) <sup>b</sup> | p-value | p-value |
|                           | <b>Medicaid</b>                                 |         |         |                                |         |         |                                          |         |         |                                |         |         |
| Overall                   | 2.16 (-2, 6.31)                                 | 0.31    | NA      | 5.75 (3.1, 8.41)               | <0.001  | NA      | 8.37 (5.12, 11.61)                       | <0.001  | NA      | 5.28 (2.19, 8.38)              | <0.001  | NA      |
| <1 year                   | 2.37 (-10.54, 15.29)                            | 0.719   | 0.23    | 0.23 (-8.22, 8.68)             | 0.958   | 0.49    | 8.03 (-1.88, 17.93)                      | 0.112   | 0.76    | 1.42 (-8.01, 10.85)            | 0.768   | 0.71    |
| 1-4 years                 | 5.76 (-1.25, 12.78)                             | 0.107   |         | 7.72 (3.19, 12.25)             | 0.001   |         | 10.98 (5.57, 16.4)                       | 0       |         | 7.58 (2.48, 12.67)             | 0.004   |         |
| 5-9 years                 | -5.6 (-13.74, 2.55)                             | 0.178   |         | 5.43 (0.18, 10.68)             | 0.043   |         | 7.76 (1.31, 14.21)                       | 0.018   |         | 5.91 (-0.02, 11.84)            | 0.051   |         |
| 10-14 years               | 5.03 (-2.25, 12.31)                             | 0.175   |         | 5.62 (0.74, 10.5)              | 0.024   |         | 5.59 (-0.6, 11.79)                       | 0.077   |         | 3.55 (-1.98, 9.08)             | 0.209   |         |
| non-Hispanic White        | 0.49 (-4.65, 5.62)                              | 0.853   | 0.49    | 5.8 (2.49, 9.11)               | 0.001   | 0.52    | 8.37 (4.33, 12.41)                       | 0       | 0.83    | 6.01 (2.29, 9.73)              | 0.002   | 0.68    |
| non-Hispanic Black        | 2.74 (-8.37, 13.85)                             | 0.629   |         | 9.89 (1.57, 18.21)             | 0.02    |         | 12.26 (3.37, 21.15)                      | 0.007   |         | 9.29 (-0.19, 18.77)            | 0.055   |         |
| non-Hispanic Other        | -11.43 (-29.14, 6.28)                           | 0.206   |         | 0.04 (-10.95, 11.03)           | 0.994   |         | 4.28 (-13.17, 21.73)                     | 0.631   |         | 4.89 (-5.85, 15.63)            | 0.372   |         |
| Hispanic                  | 7.04 (-4.01, 18.08)                             | 0.212   |         | 4.27 (-2.9, 11.44)             | 0.243   |         | 7.46 (-1.97, 16.89)                      | 0.121   |         | 2.29 (-5.96, 10.54)            | 0.586   |         |
| Male                      | 2.11 (-3.72, 7.94)                              | 0.478   | 0.94    | 10.43 (6.79, 14.06)            | 0       | <0.001  | 12.25 (7.79, 16.7)                       | 0       | 0.012   | 10.48 (6.13, 14.83)            | 0       | <0.001  |
| Female                    | 2.21 (-3.71, 8.13)                              | 0.464   |         | 0.23 (-3.67, 4.13)             | 0.908   |         | 3.83 (-0.86, 8.52)                       | 0.109   |         | -0.76 (-5.22, 3.71)            | 0.74    |         |
| non-metro                 | 10.19 (-2.08, 22.46)                            | 0.104   | 0.19    | 13.31 (0.5, 26.11)             | 0.042   | 0.24    | 12.83 (-1.2, 26.85)                      | 0.073   | 0.57    | 10.22 (-3.93, 24.36)           | 0.157   | 0.59    |
| metro                     | 1.13 (-3.38, 5.63)                              | 0.624   |         | 5.33 (2.47, 8.2)               | 0       |         | 8.59 (5.17, 12.01)                       | 0       |         | 5.05 (1.7, 8.41)               | 0.003   |         |
| High county education     | 1.13 (-6.51, 8.77)                              | 0.772   | 0.56    | 1.85 (-3.01, 6.7)              | 0.456   | 0.059   | 5.52 (-0.67, 11.7)                       | 0.08    | 0.21    | 2.21 (-3.31, 7.73)             | 0.432   | 0.24    |
| Mid-high county education | -1.36 (-8.77, 6.06)                             | 0.72    |         | 3.9 (-1.2, 9.01)               | 0.134   |         | 4.07 (-1.95, 10.1)                       | 0.185   |         | 3.74 (-2.01, 9.48)             | 0.202   |         |
| Mid-low county education  | 5.25 (-2.83, 13.32)                             | 0.203   |         | 6.75 (1.39, 12.11)             | 0.014   |         | 11.42 (4.99, 17.86)                      | 0.001   |         | 6.12 (0.11, 12.13)             | 0.046   |         |
| Low county education      | 7.09 (-3.44, 17.62)                             | 0.187   |         | 12.92 (6.29, 19.56)            | 0       |         | 13.82 (5.8, 21.84)                       | 0.001   |         | 12.12 (4.47, 19.76)            | 0.002   |         |
| Low county poverty        | -0.14 (-11.62, 11.34)                           | 0.981   | 0.91    | -0.94 (-6.52, 4.63)            | 0.74    | 0.021   | 4.54 (-4.27, 13.35)                      | 0.312   | 0.29    | -1.48 (-7.89, 4.94)            | 0.652   | 0.16    |



|                           |                      |       |      |                      |       |      |                      |       |       |                      |       |      |
|---------------------------|----------------------|-------|------|----------------------|-------|------|----------------------|-------|-------|----------------------|-------|------|
| Mid-low county poverty    | 1.24 (-6.56, 9.04)   | 0.755 |      | 4.06 (-1.19, 9.32)   | 0.13  |      | 6.16 (-0.02, 12.34)  | 0.051 |       | 4.62 (-1.41, 10.64)  | 0.133 |      |
| Mid-high county poverty   | 2.39 (-6.83, 11.61)  | 0.611 |      | 11.06 (5.09, 17.03)  | 0     |      | 13.37 (6.61, 20.13)  | 0     |       | 8.39 (1.58, 15.2)    | 0.016 |      |
| High county poverty       | 4.45 (-2.69, 11.58)  | 0.222 |      | 6.86 (1.83, 11.89)   | 0.008 |      | 8.45 (2.41, 14.5)    | 0.006 |       | 6.76 (0.9, 12.62)    | 0.024 |      |
| <b>Uninsured</b>          |                      |       |      |                      |       |      |                      |       |       |                      |       |      |
| Overall                   | -0.74 (-2.07, 0.58)  | 0.27  | NA   | -0.78 (-1.54, -0.01) | 0.047 | NA   | -0.8 (-1.82, 0.22)   | 0.12  | NA    | -0.61 (-1.51, 0.29)  | 0.18  | NA   |
| <1 year                   | -4.04 (-7.57, -0.51) | 0.025 | 0.51 | -1.39 (-3.61, 0.83)  | 0.22  | 0.52 | -2.55 (-4.99, -0.11) | 0.041 | 0.19  | -0.85 (-3.55, 1.84)  | 0.535 | 0.48 |
| 1-4 years                 | -0.36 (-2.2, 1.48)   | 0.702 |      | -1.41 (-2.61, -0.22) | 0.02  |      | -1.88 (-3.6, -0.16)  | 0.032 |       | -1.37 (-2.69, -0.05) | 0.041 |      |
| 5-9 years                 | -0.28 (-2.62, 2.07)  | 0.817 |      | -0.47 (-2.06, 1.13)  | 0.566 |      | 0.28 (-1.81, 2.37)   | 0.792 |       | -0.71 (-2.45, 1.02)  | 0.422 |      |
| 10-14 years               | -0.23 (-2.37, 1.9)   | 0.83  |      | -0.1 (-1.64, 1.43)   | 0.895 |      | 0.2 (-1.85, 2.25)    | 0.85  |       | 0.35 (-1.42, 2.12)   | 0.697 |      |
| non-Hispanic White        | 0.17 (-1.31, 1.66)   | 0.818 | 0.27 | -0.11 (-1.02, 0.79)  | 0.806 | 0.69 | 0.16 (-1.02, 1.35)   | 0.788 | 0.66  | -0.45 (-1.53, 0.64)  | 0.418 | 0.99 |
| non-Hispanic Black        | 0.8 (-2.28, 3.87)    | 0.611 |      | -0.61 (-3.26, 2.04)  | 0.651 |      | -0.85 (-3.67, 1.97)  | 0.554 |       | -0.39 (-3.35, 2.58)  | 0.798 |      |
| non-Hispanic Other        | -2.58 (-6.75, 1.59)  | 0.225 |      | -1.4 (-3.81, 1.02)   | 0.256 |      | -2.32 (-7.82, 3.17)  | 0.407 |       | -0.09 (-2.81, 2.62)  | 0.946 |      |
| Hispanic                  | -4.08 (-7.08, -1.07) | 0.008 |      | -1.25 (-4.03, 1.54)  | 0.38  |      | -1.8 (-5.83, 2.22)   | 0.38  |       | -0.07 (-2.58, 2.45)  | 0.957 |      |
| Male                      | -1.1 (-2.9, 0.71)    | 0.234 | 0.54 | -0.52 (-1.56, 0.51)  | 0.322 | 0.48 | -0.39 (-1.74, 0.95)  | 0.567 | 0.39  | -0.15 (-1.35, 1.06)  | 0.813 | 0.26 |
| Female                    | -0.24 (-2.16, 1.68)  | 0.807 |      | -1.06 (-2.19, 0.06)  | 0.064 |      | -1.27 (-2.81, 0.28)  | 0.107 |       | -1.19 (-2.55, 0.16)  | 0.085 |      |
| non-metro                 | -0.44 (-4.35, 3.47)  | 0.827 | 0.78 | -3.67 (-8.54, 1.19)  | 0.139 | 0.19 | -1.63 (-6.73, 3.47)  | 0.53  | 0.7   | -3.44 (-9.18, 2.29)  | 0.24  | 0.28 |
| metro                     | -0.95 (-2.35, 0.45)  | 0.185 |      | -0.49 (-1.27, 0.29)  | 0.217 |      | -0.88 (-1.94, 0.17)  | 0.102 |       | -0.04 (-0.93, 0.84)  | 0.922 |      |
| High county education     | 0.07 (-2.21, 2.35)   | 0.949 | 0.87 | -1.51 (-2.9, -0.12)  | 0.033 | 0.49 | -1.62 (-3.5, 0.25)   | 0.09  | 0.64  | -1.64 (-3.24, -0.04) | 0.044 | 0.43 |
| Mid-high county education | -0.37 (-2.2, 1.47)   | 0.697 |      | -1.33 (-2.83, 0.17)  | 0.083 |      | -1.39 (-3.47, 0.69)  | 0.189 |       | -0.69 (-2.38, 1)     | 0.421 |      |
| Mid-low county education  | -1.56 (-4.03, 0.91)  | 0.215 |      | 0.08 (-1.53, 1.68)   | 0.923 |      | -0.5 (-2.53, 1.52)   | 0.627 |       | 0.33 (-1.47, 2.13)   | 0.721 |      |
| Low county education      | -0.46 (-3.24, 2.32)  | 0.744 |      | -0.78 (-2.83, 1.28)  | 0.46  |      | 0.12 (-2.24, 2.48)   | 0.919 |       | -1.57 (-3.71, 0.58)  | 0.152 |      |
| Low county poverty        | 2.1 (-0.96, 5.16)    | 0.179 | 0.14 | -0.8 (-2.21, 0.62)   | 0.27  | 0.3  | -0.47 (-2.26, 1.33)  | 0.61  | 0.093 | -0.55 (-2.23, 1.12)  | 0.518 | 0.27 |

|                           |                      |       |       |                      |        |        |                        |        |       |                        |        |        |
|---------------------------|----------------------|-------|-------|----------------------|--------|--------|------------------------|--------|-------|------------------------|--------|--------|
| Mid-low county poverty    | 0.2 (-1.98, 2.37)    | 0.86  |       | -1.71 (-3.15, -0.27) | 0.02   |        | -1.5 (-3.31, 0.32)     | 0.105  |       | -2.23 (-3.9, -0.57)    | 0.009  |        |
| Mid-high county poverty   | -1.81 (-4.55, 0.93)  | 0.196 |       | -1.21 (-3.07, 0.64)  | 0.2    |        | -2.35 (-4.56, -0.14)   | 0.037  |       | -0.33 (-2.4, 1.74)     | 0.754  |        |
| High county poverty       | -1.48 (-3.28, 0.33)  | 0.108 |       | 0.2 (-1.26, 1.65)    | 0.792  |        | 1.08 (-0.85, 3.02)     | 0.273  |       | 0.24 (-1.44, 1.92)     | 0.779  |        |
| <b>Private/Other</b>      |                      |       |       |                      |        |        |                        |        |       |                        |        |        |
| Overall                   | -1.41 (-5.61, 2.78)  | 0.509 | NA    | -4.98 (-7.65, -2.31) | <0.001 | NA     | -7.57 (-10.82, -4.31)  | <0.001 | NA    | -4.45 (-7.48, -1.42)   | 0.004  | NA     |
| <1 year                   | 1.67 (-11.21, 14.55) | 0.799 | 0.199 | 1.71 (-10.67, 14.09) | 0.787  | 0.501  | -5.47 (-15.32, 4.37)   | 0.275  | 0.906 | 0.16 (-9.39, 9.72)     | 0.973  | 0.722  |
| 1-4 years                 | -5.41 (-12.38, 1.56) | 0.128 |       | -5.64 (-12.34, 1.06) | 0.099  |        | -9.1 (-14.51, -3.69)   | 0.001  |       | -6.09 (-11.2, -0.98)   | 0.019  |        |
| 5-9 years                 | 5.87 (-2.47, 14.22)  | 0.168 |       | 4.43 (-7.38, 16.24)  | 0.462  |        | -8.04 (-14.52, -1.57)  | 0.015  |       | -4.65 (-10.74, 1.45)   | 0.135  |        |
| 10-14 years               | -4.8 (-12.13, 2.53)  | 0.199 |       | -4.79 (-11.84, 2.25) | 0.182  |        | -5.79 (-12.03, 0.45)   | 0.069  |       | -4.1 (-9.83, 1.63)     | 0.16   |        |
| non-Hispanic White        | -0.66 (-5.91, 4.59)  | 0.806 | 0.506 | -1.25 (-7.71, 5.2)   | 0.703  | 0.374  | -8.53 (-12.64, -4.43)  | <0.001 | 0.761 | -5.49 (-9.37, -1.62)   | 0.005  | 0.787  |
| non-Hispanic Black        | -3.54 (-14.62, 7.54) | 0.531 |       | -4.44 (-16.14, 7.26) | 0.457  |        | -11.41 (-20.26, -2.56) | 0.012  |       | -8.74 (-18.45, 0.96)   | 0.077  |        |
| non-Hispanic Other        | 14.01 (-3.68, 31.69) | 0.121 |       | 12.26 (-7.48, 32)    | 0.223  |        | -1.95 (-19.42, 15.52)  | 0.826  |       | -4.03 (-16.14, 8.08)   | 0.514  |        |
| Hispanic                  | -2.96 (-14.02, 8.1)  | 0.6   |       | -3.23 (-13.76, 7.29) | 0.547  |        | -5.66 (-14.78, 3.47)   | 0.224  |       | -1.76 (-9.9, 6.38)     | 0.671  |        |
| Male                      | -1.01 (-6.92, 4.89)  | 0.737 | 0.791 | -2.23 (-11.3, 6.84)  | 0.629  | <0.001 | -11.86 (-16.32, -7.39) | 0      | 0.006 | -10.11 (-14.29, -5.92) | <0.001 | <0.001 |
| Female                    | -1.97 (-7.88, 3.93)  | 0.512 |       | -1.56 (-7.65, 4.54)  | 0.617  |        | -2.57 (-7.28, 2.15)    | 0.287  |       | 2.15 (-2.33, 6.63)     | 0.347  |        |
| non-metro                 | -9.75 (-22.11, 2.61) | 0.122 | 0.162 | -9.93 (-22.38, 2.51) | 0.118  | 0.494  | -11.19 (-25.35, 2.96)  | 0.121  | 0.668 | -7.03 (-21.4, 7.34)    | 0.337  | 0.856  |
| metro                     | -0.18 (-4.7, 4.35)   | 0.939 |       | -0.76 (-6.49, 4.98)  | 0.796  |        | -7.71 (-11.15, -4.26)  | 0      |       | -4.7 (-7.99, -1.42)    | 0.005  |        |
| High county education     | -1.2 (-8.96, 6.56)   | 0.762 | 0.629 | -0.96 (-8.38, 6.46)  | 0.8    | 0.029  | -3.89 (-10.11, 2.33)   | 0.22   | 0.104 | -0.27 (-5.97, 5.43)    | 0.926  | 0.174  |
| Mid-high county education | 1.72 (-5.74, 9.19)   | 0.651 |       | 1.15 (-6.86, 9.17)   | 0.778  |        | -2.68 (-8.74, 3.39)    | 0.387  |       | -2.83 (-8.81, 3.15)    | 0.353  |        |
| Mid-low county education  | -3.68 (-11.82, 4.45) | 0.375 |       | -4.25 (-12.4, 3.89)  | 0.306  |        | -10.92 (-17.39, -4.45) | 0.001  |       | -6.31 (-12.46, -0.15)  | 0.045  |        |
| Low county education      | -6.62 (-17.18, 3.93) | 0.219 |       | -7.29 (-18.32, 3.75) | 0.196  |        | -13.94 (-21.89, -6)    | 0.001  |       | -10.58 (-18.2, -2.96)  | 0.007  |        |

|                         |                      |       |    |                       |       |       |                       |       |       |                       |       |       |
|-------------------------|----------------------|-------|----|-----------------------|-------|-------|-----------------------|-------|-------|-----------------------|-------|-------|
| Low county poverty      | -1.95 (-13.67, 9.76) | 0.744 | NR | -1.28 (-12.66, 10.11) | 0.826 | 0.019 | -4.07 (-12.92, 4.77)  | 0.367 | 0.373 | 2.17 (-4.33, 8.68)    | 0.512 | 0.133 |
| Mid-low county poverty  | -1.44 (-9.14, 6.27)  | 0.715 |    | -1.56 (-9.04, 5.92)   | 0.682 |       | -4.66 (-10.89, 1.57)  | 0.142 |       | -2.46 (-8.55, 3.63)   | 0.429 |       |
| Mid-high county poverty | -0.58 (-9.79, 8.62)  | 0.901 |    | -1.7 (-13.25, 9.86)   | 0.773 |       | -11.02 (-17.8, -4.24) | 0.001 |       | -7.73 (-14.61, -0.85) | 0.028 |       |
| High county poverty     | -2.97 (-10.09, 4.16) | 0.414 |    | -3.61 (-11.2, 3.99)   | 0.352 |       | -9.54 (-15.54, -3.53) | 0.002 |       | -6.75 (-12.58, -0.92) | 0.023 |       |

<sup>a</sup>Estimates are based on multiple imputation with the exception of the complete case analysis results.

<sup>b</sup>Estimates are based on models adjusted for age, race, sex, residence, county education, and county poverty, except the variable used to define the strata in stratified analyses.

Note that the following analyses did not meet the parallel trends assumption and should be interpreted with caution: Remove 2014-2015 Expansion States: Medicaid non-Hispanic other, Uninsured age 10-14; Complete Case Analysis: Medicaid non-Hispanic white, Medicaid mid-low county poverty; Remove 2014-2015: Uninsured <1 year, Uninsured 5-9 years.

DID = difference-in-differences. DDD = difference-in-difference-in-differences. NR = not reported due to non-parallel trends. NA = not applicable.

**eTable 3. Characteristics of Study Population by Missing Data on Insurance Status**

| No. (%)                         | Total       | Not.Missing  | Missing   | p-value <sup>a</sup> |
|---------------------------------|-------------|--------------|-----------|----------------------|
| Total                           | 21069 (100) | 20347 (96.6) | 722 (3.4) | NA                   |
| Insurance                       |             |              |           | NA                   |
| None                            | 12294 (100) | 12294 (100)  | 0 (0)     |                      |
| Medicaid                        | 7728 (100)  | 7728 (100)   | 0 (0)     |                      |
| Private                         | 325 (100)   | 325 (100)    | 0 (0)     |                      |
| Missing                         | 722 (100)   | 0 (0)        | 722 (100) |                      |
| Early Medicaid Expansion Status |             |              |           | <.001                |
| Expansion                       | 7833 (100)  | 7466 (95.3)  | 367 (4.7) |                      |
| Non-Expansion                   | 13236 (100) | 12881 (97.3) | 355 (2.7) |                      |
| Time Period                     |             |              |           | 0.72                 |
| 2007-2009                       | 8438 (100)  | 8234 (97.6)  | 204 (2.4) |                      |
| 2011-2015                       | 12631 (100) | 12113 (95.9) | 518 (4.1) |                      |
| Sex                             |             |              |           | 0.63                 |
| Male                            | 11265 (100) | 10886 (96.6) | 379 (3.4) |                      |
| Female                          | 9804 (100)  | 9461 (96.5)  | 343 (3.5) |                      |
| Age                             |             |              |           | 0.018                |
| <1                              | 2071 (100)  | 1969 (95.1)  | 102 (4.9) |                      |
| 1-4                             | 7427 (100)  | 7186 (96.8)  | 241 (3.2) |                      |
| 5-9                             | 5463 (100)  | 5307 (97.1)  | 156 (2.9) |                      |
| 10-14                           | 6108 (100)  | 5885 (96.3)  | 223 (3.7) |                      |
| Race/Ethnicity                  |             |              |           | 0.19                 |
| Non-Hispanic White              | 10185 (100) | 9860 (96.8)  | 325 (3.2) |                      |
| Non-Hispanic Other              | 1854 (100)  | 1803 (97.2)  | 51 (2.8)  |                      |
| Non-Hispanic Black              | 2317 (100)  | 2215 (95.6)  | 102 (4.4) |                      |
| Hispanic                        | 6441 (100)  | 6261 (97.2)  | 180 (2.8) |                      |
| Missing                         | 272 (100)   | 208 (76.5)   | 64 (23.5) |                      |
| County Education                |             |              |           | <.001                |
| <10.9                           | 4910 (100)  | 4704 (95.8)  | 206 (4.2) |                      |
| >=10.9 & <14.1                  | 4923 (100)  | 4744 (96.4)  | 179 (3.6) |                      |
| >=14.1 & <20.7                  | 5232 (100)  | 5066 (96.8)  | 166 (3.2) |                      |
| >20.7                           | 5999 (100)  | 5829 (97.2)  | 170 (2.8) |                      |
| Missing                         | 5 (100)     | 4 (80)       | 1 (20)    |                      |
| County Income                   |             |              |           | 0.012                |
| <38                             | 5086 (100)  | 4914 (96.6)  | 172 (3.4) |                      |
| >=38 & <43                      | 5441 (100)  | 5281 (97.1)  | 160 (2.9) |                      |

| <b>No. (%)</b>                                                       | <b>Total</b> | <b>Not.Missing</b> | <b>Missing</b> | <b>p-value<sup>a</sup></b> |              |
|----------------------------------------------------------------------|--------------|--------------------|----------------|----------------------------|--------------|
| >=43 & <63                                                           | 4112 (100)   | 3940 (95.8)        | 172 (4.2)      |                            |              |
| >63                                                                  | 6425 (100)   | 6208 (96.6)        | 217 (3.4)      |                            |              |
| Missing                                                              | 5 (100)      | 4 (80)             | 1 (20)         |                            |              |
| <b>Residence</b>                                                     |              |                    |                | <b>0.23</b>                |              |
| Non-metro                                                            | 1871 (100)   | 1781 (95.2)        | 90 (4.8)       |                            |              |
| Metro                                                                | 19131 (100)  | 18501 (96.7)       | 630 (3.3)      |                            |              |
| Missing                                                              | 67 (100)     | 65 (97)            | 2 (3)          |                            |              |
| <b>Cancer Type</b>                                                   |              |                    |                | <b>&lt;.001</b>            |              |
| CNS and miscellaneous intracranial and intraspinal neoplasms         | 4289 (100)   | 4150 (96.8)        | 139 (3.2)      |                            |              |
| Germ cell tumors, trophoblastic tumors, and neoplasms of gonads      | 730 (100)    | 710 (97.3)         | 20 (2.7)       |                            |              |
| Hepatic Tumors                                                       | 389 (100)    | 378 (97.2)         | 11 (2.8)       |                            |              |
| Leukemias, myeloproliferative diseases, and myelodysplastic diseases | 6797 (100)   | 6625 (97.5)        | 172 (2.5)      |                            |              |
| Lymphomas and reticuloendothelial neoplasms                          | 2180 (100)   | 2102 (96.4)        | 78 (3.6)       |                            |              |
| Malignant Bone Tumors                                                | 963 (100)    | 940 (97.6)         | 23 (2.4)       |                            |              |
| Neuroblastoma and other peripheral nervous cell tumors               | 1438 (100)   | 1387 (96.5)        | 51 (3.5)       |                            |              |
| Other malignant epithelial neoplasms and malignant melanomas         | 1052 (100)   | 980 (93.2)         | 72 (6.8)       |                            |              |
| Other/Unspecified                                                    | 75 (100)     | 59 (78.7)          | 16 (21.3)      |                            |              |
| Renal Tumors                                                         | 1121 (100)   | 1078 (96.2)        | 43 (3.8)       |                            |              |
| Retinoblastoma                                                       | 586 (100)    | 556 (94.9)         | 30 (5.1)       |                            |              |
| Soft tissue and other extraosseous sarcomas                          | 1449 (100)   | 1382 (95.4)        | 67 (4.6)       |                            |              |
| <b>Stage</b>                                                         |              |                    |                |                            | <b>0.013</b> |
| I                                                                    | 3109 (100)   | 2998 (96.4)        | 111 (3.6)      |                            |              |
| II                                                                   | 1871 (100)   | 1826 (97.6)        | 45 (2.4)       |                            |              |
| III                                                                  | 7955 (100)   | 7768 (97.6)        | 187 (2.4)      |                            |              |
| Unstaged                                                             | 7683 (100)   | 7420 (96.6)        | 263 (3.4)      |                            |              |
| Missing                                                              | 451 (100)    | 335 (74.3)         | 116 (25.7)     |                            |              |

<sup>a</sup>p-values are based on estimates from a multivariable logistic regression model with binary variable indicating missing insurance as the response variable.

## eReferences

1. Medicaid/CHIP Upper Income Eligibility Limits for Children, 2000-2019 | The Henry J. Kaiser Family Foundation. <https://www.kff.org/medicaid/state-indicator/medicaidchip-upper-income-eligibility-limits-for-children/?currentTimeframe=0&sortModel=%7B%22colId%22:%22Location%22,%22sort%22:%22asc%22%7D>. Accessed May 17, 2019.
2. Sterne JAC, White IR, Carlin JB, et al. Multiple imputation for missing data in epidemiological and clinical research: potential and pitfalls. *BMJ*. 2009;338:b2393. doi:10.1136/BMJ.B2393
3. White IR, Royston P, Wood AM. Multiple imputation using chained equations: Issues and guidance for practice. *Stat Med*. 2011;30(4):377-399. doi:10.1002/sim.4067
4. Rubin DB. *Multiple Imputation for Nonresponse in Surveys*. Wiley; 1987. [https://books.google.com/books?id=0KruAAAAMAAJ&source=gbs\\_book\\_other\\_versions](https://books.google.com/books?id=0KruAAAAMAAJ&source=gbs_book_other_versions). Accessed May 7, 2018.
